# Supplementary material for: Prevention of bacterial colonization on non-thermal atmospheric plasma treated surgical sutures for control and prevention of surgical site infections
Source: PubMed Central journal article supplement (PMC6124751; doi:10.1371/journal.pone.0202703), 2018-09-05
Supplement: pone.0202703.s001.pdf [file pone.0202703.s001.pdf]

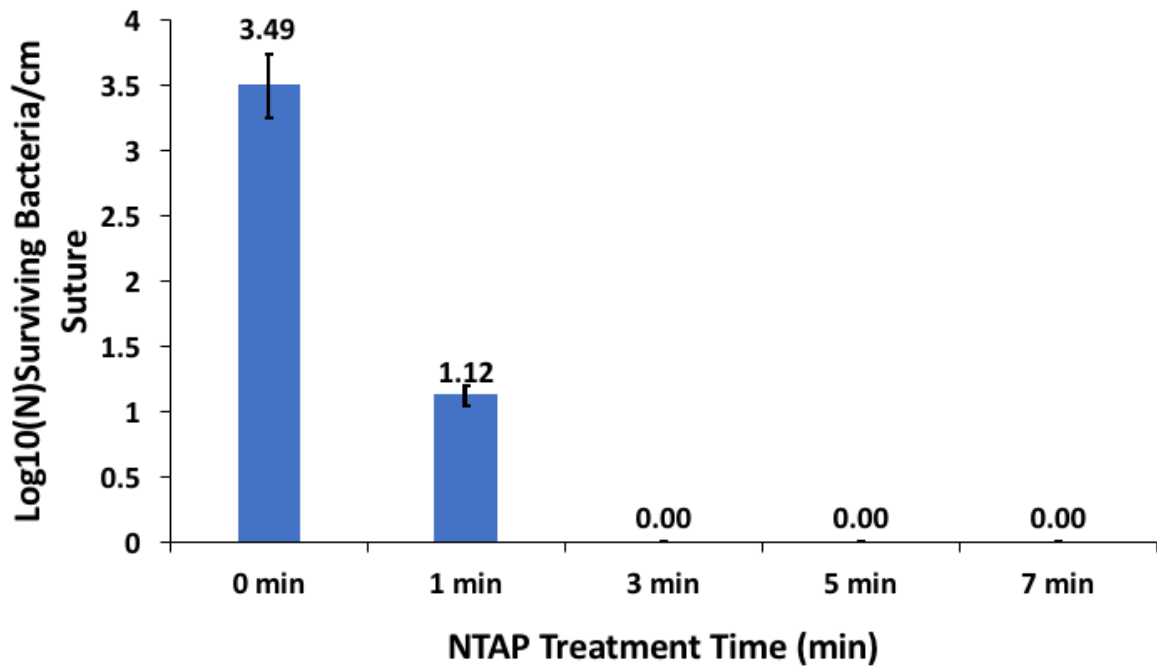

**S1 Fig. Results of a pilot study to determine the NTAP time for decontamination experiments.** Pilot experiment to determine the required NTAP treatment time for decontamination was carried out on PGLA sutures with *E. coli*. Number of surviving bacteria on sutures after NTAP treatment decreased with increasing treatment time. 3-minute NTAP treatment led to complete inactivation of bacteria.
