# Supplementary material for: Prevention of bacterial colonization on non-thermal atmospheric plasma treated surgical sutures for control and prevention of surgical site infections
Source: PubMed Central journal article supplement (PMC6124751; doi:10.1371/journal.pone.0202703), 2018-09-05
Supplement: pone.0202703.s002.pdf [file pone.0202703.s002.pdf]

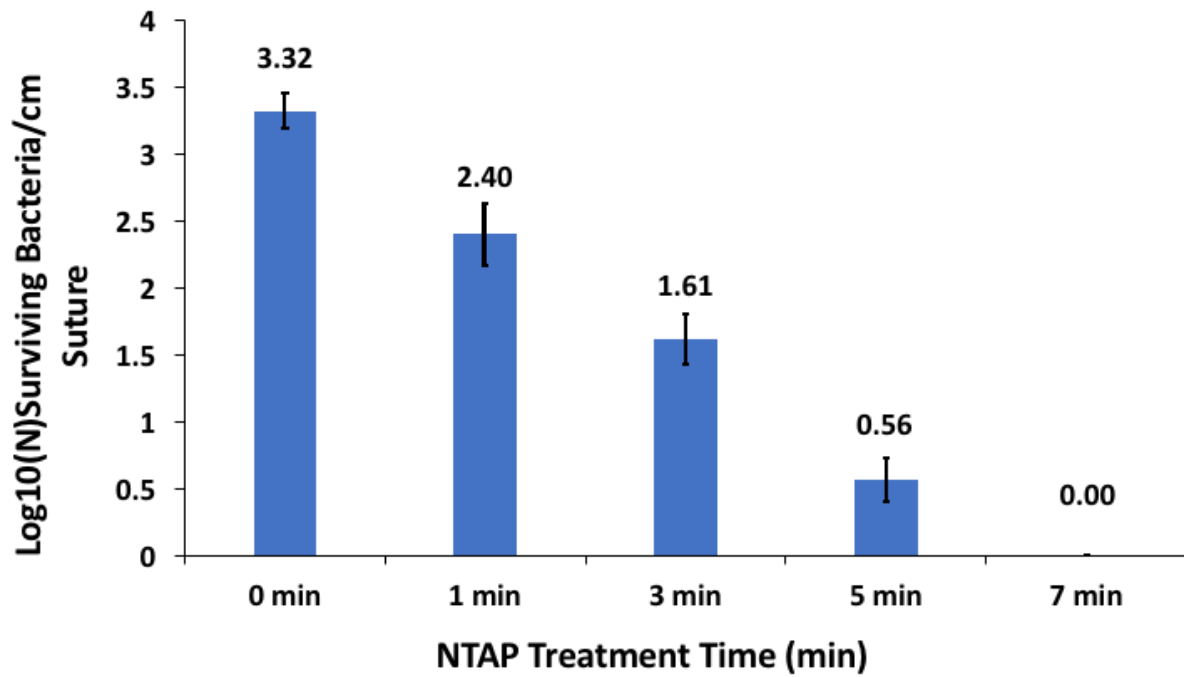

**S2 Fig. Results of a pilot study to determine the NTAP time for prevention of bacterial colonization on sutures.** Pilot experiment to determine the required NTAP treatment time for prevention of bacterial colonization was carried out on PGLA sutures with *E. coli*. Number of surviving bacteria that colonized on sutures after NTAP treatment decreased with increasing treatment time. After 7-minute NTAP treatment no bacterial colonization was observed.
