# Supplementary material for: Prevention of bacterial colonization on non-thermal atmospheric plasma treated surgical sutures for control and prevention of surgical site infections
Source: PubMed Central journal article supplement (PMC6124751; doi:10.1371/journal.pone.0202703), 2018-09-05
Supplement: pone.0202703.s003.pdf [file pone.0202703.s003.pdf]

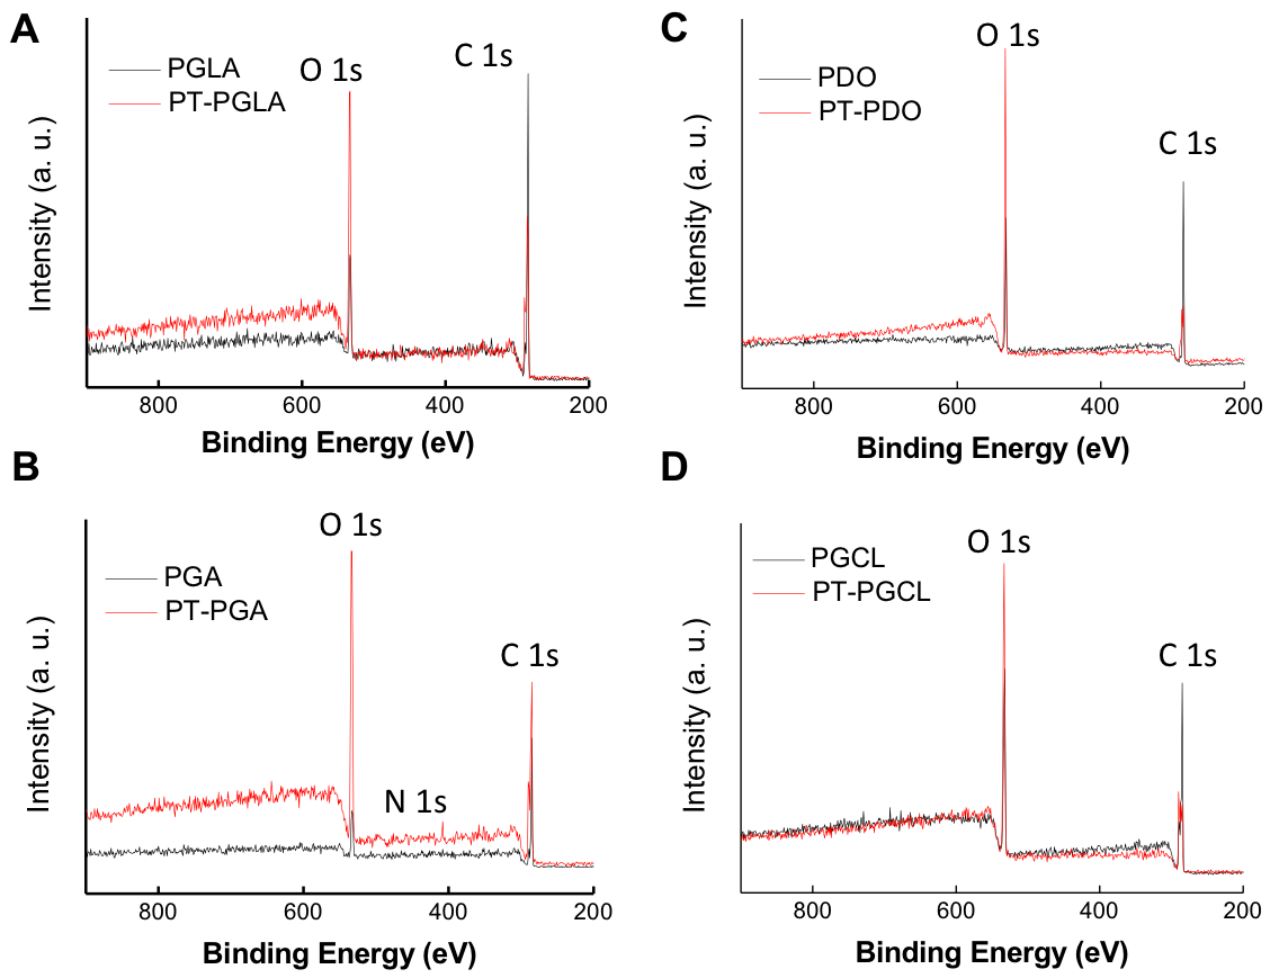

**S3 Fig. XPS survey spectra of sutures.** XPS survey spectra of (A) PGLA, (B) PGA, (C) PDO and (D) PGCL before and after 7-minute NTAP treatment.
